# Supplementary material for: Effect of manuka honey on biofilm-associated genes expression during methicillin-resistant Staphylococcus aureus biofilm formation
Source: PubMed Central journal article supplement (PMC7419495; doi:10.1038/s41598-020-70666-y), 2020-08-11
Supplement: 41598_2020_70666_MOESM1_ESM.pdf [file 41598_2020_70666_MOESM1_ESM.pdf]

**Effect of manuka honey on biofilm-associated genes expression during methicillin-resistant *Staphylococcus aureus* biofilm formation**

**Barbara Kot\*, Hubert Sytykiewicz, Iwona Sprawka, Małgorzata Witeska**

## Supplementary materials

**Table S1** Three-factorial ANOVA analysis of the examined indicators (strains, treatment, growth period) and interactions on relative expression of the tested genes (*cna*, *ebps*, *eno*, *fib*) of MRSA strains

| Indicators        | <i>cna</i>                | <i>ebps</i>               | <i>eno</i>                | <i>fib</i>                |
|-------------------|---------------------------|---------------------------|---------------------------|---------------------------|
| Strains (S)       | $F_{1, 48} = 615$ (***)   | $F_{1, 48} = 3,862$ (***) | $F_{1, 48} = 1,320$ (***) | $F_{1, 48} = 2,812$ (***) |
| Treatment (T)     | $F_{2, 48} = 2,040$ (***) | $F_{2, 48} = 1,250$ (***) | $F_{2, 48} = 4,505$ (***) | $F_{2, 48} = 1,565$ (***) |
| Growth period (G) | $F_{3, 48} = 1,358$ (***) | $F_{3, 48} = 812$ (***)   | $F_{3, 48} = 618$ (***)   | $F_{3, 48} = 952$ (***)   |
| S × T             | $F_{2, 48} = 835$ (***)   | $F_{2, 48} = 486$ (***)   | $F_{2, 48} = 435$ (**)    | $F_{2, 48} = 240$ (**)    |
| T × G             | $F_{6, 48} = 425$ (**)    | $F_{6, 48} = 364$ (***)   | $F_{6, 48} = 206$ (**)    | $F_{6, 48} = 137$ (*)     |
| S × G             | $F_{3, 48} = 115$ (**)    | $F_{3, 48} = 208$ (**)    | $F_{3, 48} = 140$ (**)    | $F_{3, 48} = 69$ (*)      |
| S × T × G         | $F_{6, 48} = 62$ (*)      | $F_{6, 48} = 90$ (*)      | $F_{6, 48} = 25$ (*)      | $F_{6, 48} = 44$ (*)      |

\*  $P < 0.05$ ; \*\*  $P < 0.01$ ; \*\*\*  $P < 0.001$ . Tested variables: i) strains – weak and strong biofilm formation; ii) treatment: control, ¼ MIC and ½ MIC; iii) growth period – 4, 8, 12 and 24 h.

**Table S2** Three-factorial ANOVA analysis of the examined indicators (strains, treatment, growth period) and interactions on relative expression of the tested genes (*icaA*, *icaD*, *map/eap*) of MRSA strains

| Indicators        | <i>icaA</i>               | <i>icaD</i>            | <i>map/eap</i>            |
|-------------------|---------------------------|------------------------|---------------------------|
| Strains (S)       | $F_{1, 48} = 1,450$ (***) | $F_{1, 48} = 257$ (**) | $F_{1, 48} = 4,854$ (***) |
| Treatment (T)     | $F_{2, 48} = 1,220$ (***) | $F_{2, 48} = 162$ (**) | $F_{2, 48} = 2,690$ (***) |
| Growth period (G) | $F_{3, 48} = 955$ (***)   | $F_{3, 48} = 98$ (*)   | $F_{3, 48} = 2,215$ (***) |
| S × T             | $F_{2, 48} = 664$ (***)   | $F_{2, 48} = 50$ (*)   | $F_{2, 48} = 1,107$ (***) |
| T × G             | $F_{6, 48} = 273$ (**)    | $F_{6, 48} = 26$ (*)   | $F_{6, 48} = 814$ (***)   |
| S × G             | $F_{3, 48} = 82$ (*)      | $F_{3, 48} = 12$ (*)   | $F_{3, 48} = 658$ (***)   |
| S × T × G         | $F_{6, 48} = 29$ (*)      | $F_{6, 48} = 0.5$ (ns) | $F_{6, 48} = 116$ (**)    |

\*  $P < 0.05$ ; \*\*  $P < 0.01$ ; \*\*\*  $P < 0.001$ ; ns – non-significant. Tested variables: i) strains – weak and strong biofilm formation; ii) treatment: control, ¼ MIC and ½ MIC; iii) growth period – 4, 8, 12 and 24 h.

**Table S3** Three-factorial ANOVA analysis of the studied variables (strains, treatment, growth period) and interactions on the bacteria viability in biofilm

| Indicators        | Bacteria viability      |
|-------------------|-------------------------|
| Strains (S)       | $F_{1, 48} = 390$ (***) |
| Treatment (T)     | $F_{2, 48} = 255$ (***) |
| Growth period (G) | $F_{3, 48} = 127$ (**)  |
| S × T             | $F_{2, 48} = 104$ (**)  |
| T × G             | $F_{6, 48} = 38$ (*)    |
| S × G             | $F_{3, 48} = 20$ (*)    |
| S × T × G         | $F_{6, 48} = 14$ (*)    |

\*  $P < 0.05$ ; \*\*  $P < 0.01$ ; \*\*\*  $P < 0.001$ . Tested variables: i) strains – weak and strong biofilm formation; ii) treatment – control,  $\frac{1}{4}$  MIC and  $\frac{1}{2}$  MIC; iii) growth period – 4, 8, 12 and 24 h.
